# Supplementary material for: Understanding the traditional values and use of okra among pregnant women in western Ethiopia: a qualitative study
Source: PubMed Central journal article supplement — BMJ Open. 2023 Apr 12;13(4):e071612. doi: 10.1136/bmjopen-2023-071612 (PMC10106077; doi:10.1136/bmjopen-2023-071612), 2023-04-12
Supplement: bmjopen-2023-071612supp001.pdf [file bmjopen-2023-071612supp001.pdf]

## QUALITATIVE DATA COLLECTION APPROCHES

### Consent Form:

Thank you for setting aside time to talk with us today. I am. \_\_\_\_\_ currently studying the traditional values and use of okra, parts of the Okra plant being utilized for food processing by pregnant women of western Ethiopia. The purpose of this study is used to reveal traditional values and use of okra among pregnant women, and also the associated cultural meaning attached to it. Furthermore, parts of the okra plant being utilized by pregnant women will also be explored.

By meeting with you as a researcher, we hope to gain a better understanding of:

Traditional values and use of okra among pregnant women

*The edible parts of the Okra plant*

*Commonly utilized parts of okra and the reason behind*

*Importance of purpose Okra during pregnancy*

*Cultural food processing and preservation techniques of okra*

Before we begin, we want to let you know that any information or examples we discuss during this interview or discussion will not be transferred or copied to any specific person or institution and all identifying information will be removed to maintain your privacy. You are free to choose not to respond to any of our questions or stop the interview or discussion at any time. we would like to record this conversation, solely to listen attentively now and take notes. Are you willing to cooperate?

### 1. In-depth Interview (IDI) Guide

| Theme                                             | Questions to be interviewed with probes                                                                                                                                                                                                                                         | Remarks |
|---------------------------------------------------|---------------------------------------------------------------------------------------------------------------------------------------------------------------------------------------------------------------------------------------------------------------------------------|---------|
| Consumption of okra by pregnant women             | <ul style="list-style-type: none"> <li>• Parts of okra being utilized</li> <li>• Which part is commonly utilized?</li> <li>• Reason out?</li> <li>• Which part is rarely utilized?</li> <li>• Reason out?</li> <li>• Knowledge about okra (its nutritional benefits)</li> </ul> |         |
| Cultural practice related to Okra food processing | <ul style="list-style-type: none"> <li>• How okra is prepared (forms of diet and preservation)</li> <li>• How okra pod is obtained</li> </ul>                                                                                                                                   |         |
| Traditional and health benefits of okra           | <ul style="list-style-type: none"> <li>• Traditional values of okra</li> <li>• Beliefs of pregnant women about okra</li> </ul>                                                                                                                                                  |         |

### 2. Focused Group Discussion (FGD) Guide

| Theme                  | Questions to be discussed with probes                                                                                                                                                                        | Rem |
|------------------------|--------------------------------------------------------------------------------------------------------------------------------------------------------------------------------------------------------------|-----|
| <b>Importance</b>      | <ul style="list-style-type: none"> <li>• Nutritional importance of Okra for pregnant women &amp; others.</li> <li>• Traditional values and other important of Okra</li> <li>• Composition of Okra</li> </ul> |     |
| <b>Utilization</b>     | <ul style="list-style-type: none"> <li>• Parts of Okra utilized</li> <li>• Parts of Okra not utilized</li> <li>• Reasons for not utilized</li> </ul>                                                         |     |
| <b>Food processing</b> | <ul style="list-style-type: none"> <li>• Cultural methods of Okra plant food processing</li> <li>• Type of meal used or prepared with Okra</li> <li>• Methods of Okra plant food preservation</li> </ul>     |     |

|                    |                                                                                                                                                                                                 |  |
|--------------------|-------------------------------------------------------------------------------------------------------------------------------------------------------------------------------------------------|--|
|                    | <ul style="list-style-type: none"><li>• Methods of Okra plant harvestation</li></ul>                                                                                                            |  |
| <b>Precautions</b> | <ul style="list-style-type: none"><li>• Any precaution with reasons to be considered to use Okra plant food</li><li>• Any factor responsible for the contamination of okra plant food</li></ul> |  |
